# Supplementary material
Source: HighWire-hosted journal article supplement (https://erj.ersjournals.com/content/60/5/2200765)
Supplement: inline-supplementary-material-1 [file inline-supplementary-material-1.pdf]

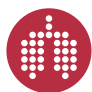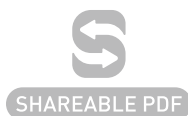

# Long-term multidrug- and rifampicin-resistant tuberculosis treatment outcome by new WHO definitions in Germany

Ralf Otto-Knapp<sup>1</sup>, Brit Häcker<sup>1</sup>, David Krieger<sup>2</sup>, Katarina Stete<sup>2,3</sup>, Katharina Starzacher<sup>1</sup>, Christina Maier<sup>4,5</sup>, Jan Heyckendorf<sup>6</sup>, Korkut Avsar<sup>7,8</sup>, Isabelle Suárez<sup>9,10,11</sup>, Jan Rybníček<sup>9,10,11</sup>, Torsten Bauer<sup>1,2</sup>, Gunar Günther<sup>12,13</sup> and Christoph Lange<sup>4,5,14,15</sup>

<sup>1</sup>German Central Committee against Tuberculosis (DZK), Berlin, Germany. <sup>2</sup>Lung Hospital Heckeshorn, Helios Klinikum Emil von Behring, Berlin, Germany. <sup>3</sup>Division of Infectious Diseases, Department of Medicine II, Medical Center, University of Freiburg, Freiburg, Germany. <sup>4</sup>Division of Clinical Infectious Diseases, Research Center Borstel, Borstel, Germany. <sup>5</sup>German Center for Infection Research (DZIF), TTU-TB, Borstel, Germany. <sup>6</sup>Department of Internal Medicine I, University Medical Center Schleswig-Holstein, Kiel, Germany. <sup>7</sup>Asklepios Fachklinik Gauting, Gauting, Germany. <sup>8</sup>Lungenärzte am Rundfunkplatz, Munich, Germany. <sup>9</sup>Department I of Internal Medicine, Faculty of Medicine and University of Cologne, University of Cologne, Cologne, Germany. <sup>10</sup>Center for Molecular Medicine Cologne (CMMC), Faculty of Medicine and University of Cologne, University of Cologne, Cologne, Germany. <sup>11</sup>German Center for Infection Research (DZIF), Partner Site Bonn-Cologne, Cologne, Germany. <sup>12</sup>Department of Pulmonology and Allergology, Inselspital, Bern University Hospital, University of Bern, Bern, Switzerland. <sup>13</sup>Department of Human, Biological and Translational Medical Sciences, University of Namibia, School of Medicine, Windhoek, Namibia. <sup>14</sup>Respiratory Medicine and International Health, University of Lübeck, Lübeck, Germany. <sup>15</sup>Baylor College of Medicine and Texas Children's Hospital, Houston, TX, USA.

Corresponding author: Ralf Otto-Knapp ([info@dzk-tuberkulose.de](mailto:info@dzk-tuberkulose.de))

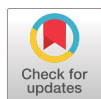

Shareable abstract (@ERSpublications)

**Long-term outcomes of MDR/RR-TB with 3-year follow-up show 62% favourable outcomes in Germany. 26% were lost to follow-up or transferred. It was possible to categorise 95% of favourable outcomes as cured using the 2021 WHO outcome definitions.** <https://bit.ly/3bJnvfR>

**Cite this article as:** Otto-Knapp R, Häcker B, Krieger D, et al. Long-term multidrug- and rifampicin-resistant tuberculosis treatment outcome by new WHO definitions in Germany. *Eur Respir J* 2022; 60: 2200765 [DOI: 10.1183/13993003.00765-2022].

This single-page version can be shared freely online.

Copyright ©The authors 2022. For reproduction rights and permissions contact [permissions@ersnet.org](mailto:permissions@ersnet.org)

Received: 11 April 2022  
Accepted: 4 Aug 2022

*To the Editor:*

Multidrug- and rifampicin-resistant tuberculosis (MDR/RR-TB) are growing threats to the goals of the END TB Strategy [1], causing substantial suffering and overwhelming costs for affected patients and families. Global treatment success for MDR/RR-TB is insufficient at only 59%. Germany has a low tuberculosis incidence (5.0 per 100 000) with 2.7% MDR-TB cases. Although resources are available, treatment success for these patients remains below World Health Organization (WHO) targets, according to national surveillance data [2]. However, long-term treatment outcomes are not systematically captured.
